# Supplementary material
Source: ML conference proceedings conference paper supplement (https://proceedings.neurips.cc/paper_files/paper/2016/hash/5a1e3a5aede16d438c38862cac1a78db-Abstract.html)
Supplement: Supplementary file [file 5a1e3a5aede16d438c38862cac1a78db-Supplemental.zip]

---

# Sparse Support Recovery with Non-smooth Loss Functions: Supplementary Material

---

**Kévin Degraux**  
ISPGROUP/ICTEAM, FNRS  
Université catholique de Louvain  
Louvain-la-Neuve, Belgium 1348  
kevin.degraux@uclouvain.be

**Gabriel Peyré**  
CNRS, DMA  
École Normale Supérieure  
Paris, France 75775  
gabriel.peyre@ens.fr

**Jalal M. Fadili**  
Normandie Univ, ENSICAEN,  
CNRS, GREYC,  
Caen, France 14050  
Jalal.Fadili@ensicaen.fr

**Laurent Jacques**  
ISPGROUP/ICTEAM, FNRS  
Université catholique de Louvain  
Louvain-la-Neuve, Belgium 1348  
laurent.jacques@uclouvain.be

## 1 Proof of Theorem 1 for $\alpha = 1$

As the proof presented in the paper for  $\alpha = \infty$ , our proof consists in construction a vector supported on  $J$ , obeying the implicit relationship (6) which becomes in this case

$$x_{\tau,J} = x_{0,J} + \tilde{\Phi}^{-1}\Theta w - \tau v_{\infty,J}, \quad (12)$$

and which is indeed a solution to  $(\mathcal{P}_{\infty}^{\tau}(\Phi x_0 + w))$  for an appropriate regime of the parameters  $(\tau, \|w\|_{\alpha})$ . Note that we assume that  $(\text{INJ}_1)$  holds and in particular,  $\tilde{\Phi}$  is invertible. If we define  $Z_p \stackrel{\text{def.}}{=} \text{sat}(p)$ , note that

$$\partial\|p\|_{\infty} = \left\{ u \mid u_{Z_p^c} = 0, \langle u_{Z_p}, \text{sign}(p_{Z_p}) \rangle = 1, \text{sign}(u_{Z_p}) = \text{sign}(p_{Z_p}) \right\},$$

so that for an optimal primal-dual pair  $(x, p)$ , the condition (8) reads,

$$y_{Z_p^c} = \Phi_{Z_p^c, \cdot} x, \quad \langle \Phi_{Z_p, \cdot}^* \text{sign}(p_{Z_p}), x \rangle = \langle \text{sign}(p_{Z_p}), y_{Z_p} \rangle - \tau, \quad (13)$$

and

$$\text{sign}(y_{Z_p} - \Phi_{Z_p, \cdot} x) = \text{sign}(p_{Z_p}). \quad (14)$$

To simplify the notations, we use

$$\Theta_p \stackrel{\text{def.}}{=} \begin{bmatrix} \text{Id}_{Z_p^c, \cdot} \\ \text{sign}(p_{Z_p}^*) \text{Id}_{Z_p, \cdot} \end{bmatrix} \quad \text{and} \quad \tilde{\Phi}_p \stackrel{\text{def.}}{=} \Theta_p \Phi_{\cdot, J}.$$

One should then look for a candidate primal-dual pair  $(\hat{x}, \hat{p})$  such that  $\text{supp}(\hat{x}) = J$  and satisfying

$$\tilde{\Phi}_{\hat{p}} \hat{x}_J = \tilde{y}_{\hat{p}} = \Theta_{\hat{p}} y - \tau \delta_{|J|} = \tilde{\Phi}_{\hat{p}} x_{0,J} + \Theta_{\hat{p}} w - \tau \delta_{|J|}. \quad (15)$$

We now need to show that the first order conditions (7) and (8) hold for some  $p = \hat{p}$  solution of the “perturbed” dual problem  $(\mathcal{D}_{\infty}^{\tau}(\Phi x_0 + w))$  with  $x = \hat{x}$ . Actually, we will show that under the conditions of the theorem, this holds for  $\hat{p} = p_{\infty}$ , i.e.,  $p_{\infty}$  is solution of  $(\mathcal{D}_{\infty}^{\tau}(\Phi x_0 + w))$  so that

$$\hat{x}_J = x_{0,J} + \tilde{\Phi}^{-1}\Theta w - \tau \tilde{\Phi}^{-1}\delta_{|J|} = x_{0,J} + \tilde{\Phi}^{-1}\Theta w - \tau v_{\infty,J}.$$

We remind that as defined in Section 1.4,  $\Theta = \Theta_{p_\infty}$  and  $\tilde{\Phi} = \tilde{\Phi}_{p_\infty}$  and that  $v_{\infty,J} = \tilde{\Phi}^{-1}\delta_{|J|}$ . Let us start by proving the equality part of (7),  $\Phi_{\cdot,J}^* p_\infty = \text{sign}(\hat{x}_J)$ . Noting  $\text{Id}_{I,J}$  the restriction from  $J$  to  $I$ , we have

$$\text{sign}\left(x_{0,I} + \text{Id}_{I,J}\tilde{\Phi}^{-1}\Theta w - \tau v_{\infty,I}\right) = \text{sign}(x_{0,I})$$

as soon as

$$\left|\left(\tilde{\Phi}^{-1}\Theta w\right)_i - \tau v_{\infty,i}\right| < |x_{0,I}| \quad \forall i \in I.$$

It is sufficient to require

$$\begin{aligned} \|\text{Id}_{I,J}\tilde{\Phi}^{-1}\Theta w - \tau v_{\infty,I}\|_\infty &< \underline{x} \\ \|\tilde{\Phi}^{-1}\Theta\|_{\infty,\infty}\|w\|_\infty + \tau\|v_{\infty,I}\|_\infty &< \underline{x}, \end{aligned}$$

with  $\underline{x} = \min_{i \in I} |x_{0,I}|$ . Injecting the fact that  $\|w\|_\infty < c_1\tau$  (the value of  $c_1$  will be derived later), we get the condition

$$\tau(bc_1 + \nu) \leq \underline{x},$$

with  $b = \|\tilde{\Phi}^{-1}\Theta\|_{\infty,\infty}$  and  $\nu = \|v_{\infty,I}\|_\infty \leq b$ . Rearranging the terms, we obtain

$$\tau \leq \frac{\underline{x}}{bc_1 + \nu} = c_2\underline{x},$$

which guarantees  $\text{sign}(\hat{x}_I) = \text{sign}(x_{0,I})$ . Outside  $I$ , defining  $\text{Id}_{\tilde{J},J}$  as the restriction from  $J$  to  $\tilde{J}$ , we must have

$$\Phi_{\cdot,\tilde{J}}^* p_\infty = \text{sign}\left(\text{Id}_{\tilde{J},J}\tilde{\Phi}^{-1}\Theta w - \tau v_{\infty,\tilde{J}}\right).$$

From Lemma 1, we know that  $-\text{sign}(v_{\infty,\tilde{J}}) = \Phi_{\cdot,\tilde{J}}^* p_\infty$ , so that the condition is satisfied as soon as

$$\left|\left(\tilde{\Phi}^{-1}\Theta w\right)_j\right| < \tau|v_{\infty,j}| \quad \forall j \in \tilde{J}.$$

Noting  $\underline{v} = \min_{j \in \tilde{J}} |v_{\infty,j}|$ , we get the sufficient condition for (7),

$$\begin{aligned} \|\tilde{\Phi}^{-1}\Theta w\|_\infty &< \tau\underline{v}, \\ \|w\|_\infty &< \tau\frac{\underline{v}}{b}. \end{aligned} \tag{c_1a}$$

We can now verify (13) and (14). From (15) we see that (13) is satisfied *i.e.*,

$$y_{Z^c} = \Phi_{Z^c,J}\hat{x}_J \quad \text{and} \quad \text{sign}(p_{\infty,Z})^* \Phi_{Z,J}\hat{x}_J = \text{sign}(p_{\infty,Z})^* y_Z - \tau.$$

On  $Z$ , we have

$$y_Z - \Phi_{Z,\cdot}\hat{x} = w_Z - \Phi_{Z,J}\tilde{\Phi}^{-1}\Theta w + \tau\Phi_{Z,J}v_{\infty,J}.$$

We know from Lemma 1 that

$$\text{sign}(p_{\infty,Z}) = \text{sign}(\Phi_{Z,J}v_{\infty,J})$$

so that (14) holds, *i.e.*,  $\text{sign}(y - \Phi\hat{x})_Z = \text{sign}(p_{\infty,Z})$  as soon as

$$\begin{aligned} \|w_Z - \Phi_{Z,J}\tilde{\Phi}^{-1}\Theta w\|_\infty &\leq \tau \min_{i \in Z} |\Phi_{i,J}v_{\infty,J}| \\ \|\text{Id}_{Z,\cdot} - \Phi_{Z,J}\tilde{\Phi}^{-1}\Theta\|_{1,\infty}\|w\|_1 &\leq \underline{z}\tau \end{aligned}$$

with  $\underline{z} \stackrel{\text{def.}}{=} \min_{i \in Z} |\Phi_{i,J}v_{\infty,J}|$  and finally, noting  $a \stackrel{\text{def.}}{=} \|\text{Id}_{Z,\cdot} - \Phi_{Z,J}\tilde{\Phi}^{-1}\Theta\|_{1,\infty}$ ,

$$\|w\|_1 \leq \frac{\underline{z}}{a}\tau. \tag{c_1b}$$

(c<sub>1</sub>a) and (c<sub>1</sub>b) together give the value of  $c_1$ . This ensures that  $\hat{x}$  is solution to  $(\mathcal{P}_1^\tau(\Phi x_0 + w))$  and  $p_\infty$  solution to  $(\mathcal{D}_\infty^\tau(\Phi x_0 + w))$ , which concludes the proof.  $\square$
